# Supplementary material for: eQTL of KCNK2 regionally influences the brain sulcal widening: evidence from 15,597 UK Biobank participants with neuroimaging data
Source: Springer Nature journal article supplement (doi:10.1007/s00429-018-1808-9), 2018-12-05
Supplement: MOESM1 [file 16316640]

**Table S1. Associated slopes for the Figure 1. (c)**

| <b>Feature</b>               | <b>Sulcus</b>       | <b>Hemisphere</b> | <b>Slope</b> |
|------------------------------|---------------------|-------------------|--------------|
| <b>Opening</b>               | Sylvian Fissure     | left              | 0.0322       |
|                              |                     | right             | 0.0325       |
|                              | Anterior Cingulate  | left              | 0.0217       |
|                              |                     | right             | 0.0228       |
|                              | Posterior Cingulate | left              | 0.0282       |
|                              |                     | right             | 0.0277       |
|                              | Intraparietal       | left              | 0.0252       |
|                              |                     | right             | 0.0232       |
|                              | Central             | left              | 0.029        |
|                              |                     | right             | 0.0293       |
|                              | Inferior Frontal    | left              | 0.0244       |
|                              |                     | right             | 0.0225       |
|                              | Superior Frontal    | left              | 0.0254       |
|                              |                     | right             | 0.0252       |
|                              | Inferior Temporal   | left              | 0.0145       |
|                              |                     | right             | 0.014        |
| Superior Temporal            | left                | 0.0259            |              |
|                              | right               | 0.0261            |              |
| Subparietal                  | left                | 0.02              |              |
|                              | right               | 0.0206            |              |
| <b>Grey Matter Thickness</b> | Sylvian Fissure     | left              | -0.019       |
|                              |                     | right             | -0.0183      |
|                              | Anterior Cingulate  | left              | -0.0181      |
|                              |                     | right             | -0.0199      |
|                              | Posterior Cingulate | left              | -0.0125      |
|                              |                     | right             | -0.0139      |
|                              | Intraparietal       | left              | -0.0095      |
|                              |                     | right             | -0.012       |
|                              | Central             | left              | -0.0111      |
|                              |                     | right             | -0.0105      |
|                              | Inferior Frontal    | left              | -0.0145      |
|                              |                     | right             | -0.0126      |
|                              | Superior Frontal    | left              | -0.0105      |
|                              |                     | right             | -0.0099      |
|                              | Inferior Temporal   | left              | -0.0154      |
|                              |                     | right             | -0.0156      |
| Superior Temporal            | left                | -0.0199           |              |
|                              | right               | -0.0194           |              |
| Subparietal                  | left                | -0.0207           |              |
|                              | right               | -0.0244           |              |

**Table S2. Heritability estimates and their associated p-values corresponding to Figure 2.**

| <b>Feature</b>               | <b>Sulcus</b>       | <b>Left Hemisphere</b>                 | <b>Right Hemisphere</b>                |
|------------------------------|---------------------|----------------------------------------|----------------------------------------|
| <b>Opening</b>               | Sylvian Fissure     | $0.4 \pm 0.048 (5.3 \cdot 10^{-18})$   | $0.423 \pm 0.049 (5.3 \cdot 10^{-19})$ |
|                              | Anterior Cingulate  | $0.23 \pm 0.049 (1.1 \cdot 10^{-6})$   | $0.099 \pm 0.048 (0.02)$               |
|                              | Posterior Cingulate | $0.275 \pm 0.049 (7.2 \cdot 10^{-9})$  | $0.19 \pm 0.049 (4.9 \cdot 10^{-5})$   |
|                              | Intraparietal       | $0.388 \pm 0.049 (1.6 \cdot 10^{-15})$ | $0.345 \pm 0.049 (4.8 \cdot 10^{-13})$ |
|                              | Central             | $0.445 \pm 0.049 (1.7 \cdot 10^{-19})$ | $0.349 \pm 0.049 (6.7 \cdot 10^{-13})$ |
|                              | Inferior Frontal    | $0.269 \pm 0.049 (1.2 \cdot 10^{-8})$  | $0.317 \pm 0.048 (9.7 \cdot 10^{-12})$ |
|                              | Superior Frontal    | $0.246 \pm 0.049 (3.2 \cdot 10^{-7})$  | $0.285 \pm 0.049 (2.4 \cdot 10^{-9})$  |
|                              | Inferior Temporal   | $0.151 \pm 0.049 (9.2 \cdot 10^{-4})$  | $0.184 \pm 0.049 (6.6 \cdot 10^{-5})$  |
|                              | Superior Temporal   | $0.342 \pm 0.048 (2.4 \cdot 10^{-13})$ | $0.318 \pm 0.049 (1.2 \cdot 10^{-11})$ |
|                              | Subparietal         | $0.198 \pm 0.049 (2.8 \cdot 10^{-5})$  | $0.175 \pm 0.048 (1.1 \cdot 10^{-4})$  |
| <b>Grey Matter Thickness</b> | Sylvian Fissure     | $0.371 \pm 0.048 (2.8 \cdot 10^{-16})$ | $0.323 \pm 0.048 (1.5 \cdot 10^{-12})$ |
|                              | Anterior Cingulate  | $0.218 \pm 0.049 (3.1 \cdot 10^{-6})$  | $0.079 \pm 0.048 (0.05)$               |
|                              | Posterior Cingulate | $0.144 \pm 0.049 (1.3 \cdot 10^{-3})$  | $0.127 \pm 0.048 (3.4 \cdot 10^{-3})$  |
|                              | Intraparietal       | $0.173 \pm 0.048 (1.0 \cdot 10^{-4})$  | $0.239 \pm 0.048 (2.0 \cdot 10^{-7})$  |
|                              | Central             | $0.232 \pm 0.048 (4.2 \cdot 10^{-7})$  | $0.253 \pm 0.049 (5.6 \cdot 10^{-8})$  |
|                              | Inferior Frontal    | $0.223 \pm 0.048 (1.2 \cdot 10^{-6})$  | $0.224 \pm 0.049 (1.6 \cdot 10^{-6})$  |
|                              | Superior Frontal    | $0.151 \pm 0.048 (6.3 \cdot 10^{-4})$  | $0.167 \pm 0.048 (2.0 \cdot 10^{-4})$  |
|                              | Inferior Temporal   | $0.1 \pm 0.048 (0.02)$                 | $0.166 \pm 0.049 (2.6 \cdot 10^{-4})$  |
|                              | Superior Temporal   | $0.254 \pm 0.048 (2.9 \cdot 10^{-8})$  | $0.266 \pm 0.048 (7.4 \cdot 10^{-9})$  |
|                              | Subparietal         | $0.159 \pm 0.049 (5.7 \cdot 10^{-4})$  | $0.123 \pm 0.048 (4.9 \cdot 10^{-3})$  |

**Table S3. Summary GTEx information on the significant loci** (GTEx Analysis Release V7 (dbGaP Accession phs000424.v7.p2))

| chr | rsid       | maf<br>in ~12k<br>subjects | Nearest gene(s)                                          | eQTLs GTEx (meta p-val)                                                                                                                                                                                                    |
|-----|------------|----------------------------|----------------------------------------------------------|----------------------------------------------------------------------------------------------------------------------------------------------------------------------------------------------------------------------------|
| 1   | rs864736   | 0.45765                    | <i>KCNK2</i>                                             | <i>KCNK2</i> (multi-tissue $9.7 \times 10^{-6}$ ; significant tissue: ovary)                                                                                                                                               |
| 1   | rs59084003 | 0.06957                    | <i>KCNK2</i>                                             | No significant eQTLs (maf probably too low)                                                                                                                                                                                |
| 8   | rs11774568 | 0.27672                    | <i>DEFB136</i> ;<br><i>DEFB135</i>                       | Highly intergenic regions, notably significant eQTLs in brain tissues with genes [ <i>'CTSB'</i> , <i>'RP11-481A20.10'</i> , <i>'RP11-481A20.11'</i> , <i>'RP11-351I21.7'</i> , <i>'RP11-351I21.6'</i> , <i>'FAM66A'</i> ] |
| 9   | rs10980645 | 0.29548                    | Intron of <i>LPARI</i>                                   | No significant eQTLs                                                                                                                                                                                                       |
| 12  | rs12146713 | 0.09496                    | Intron of <i>NUAK1</i>                                   | ENSG00000257890.1 (lincRNA) (multi-tissue $4.1 \times 10^{-28}$ ; significant tissues: skin-lower_leg; artery-tibial; adipose-subcutaneous)                                                                                |
| 16  | rs9933149  | 0.37965                    | <i>LOC101928708</i> ;<br><i>C16orf95</i> ; <i>FBXO31</i> | ENSG00000261651.1 (antisense RNA) (p-val computed only in testis tissue $3.0 \times 10^{-7}$ )                                                                                                                             |

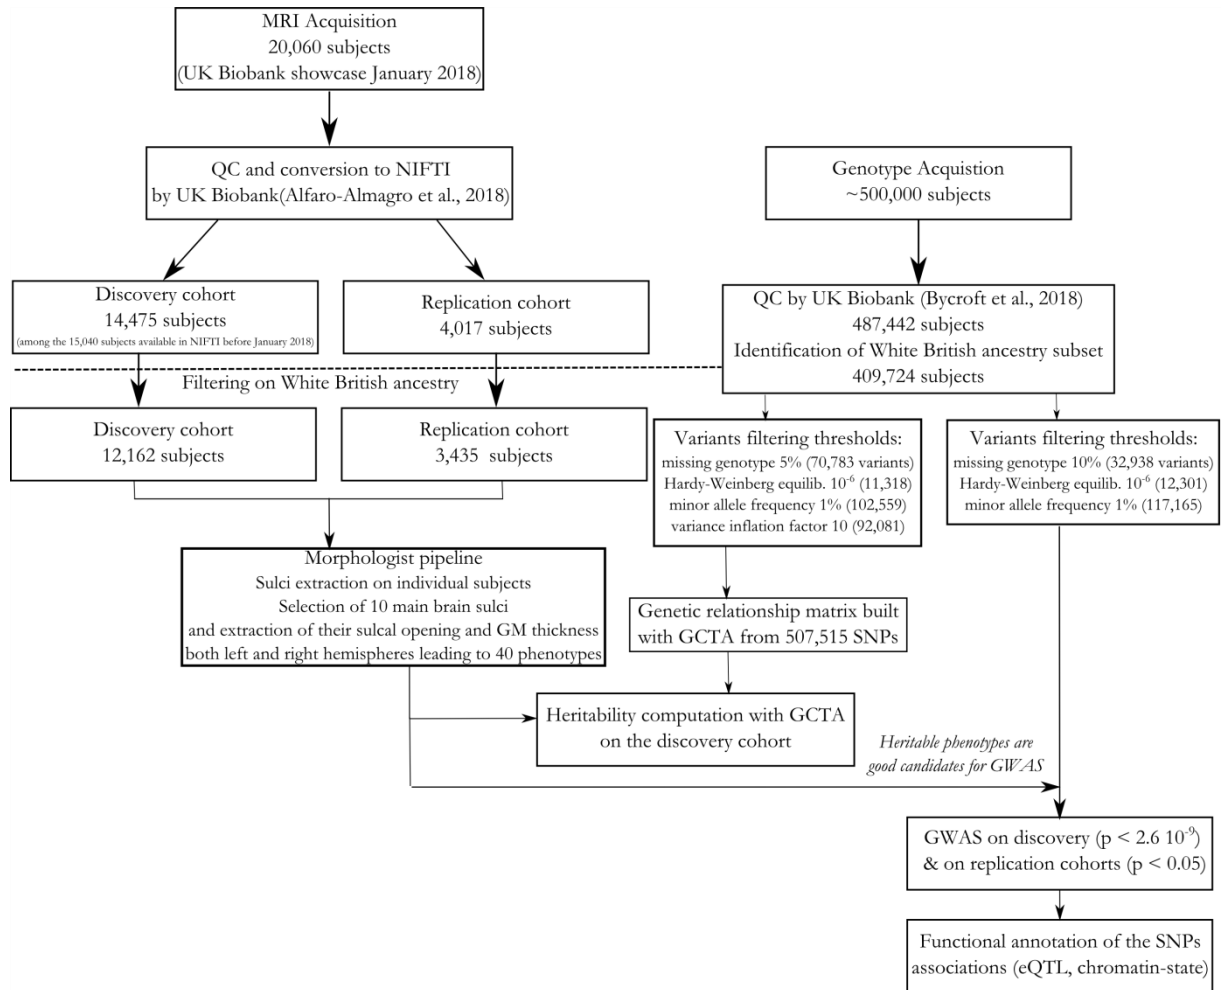

**Figure S1. Schematic of the study design.**

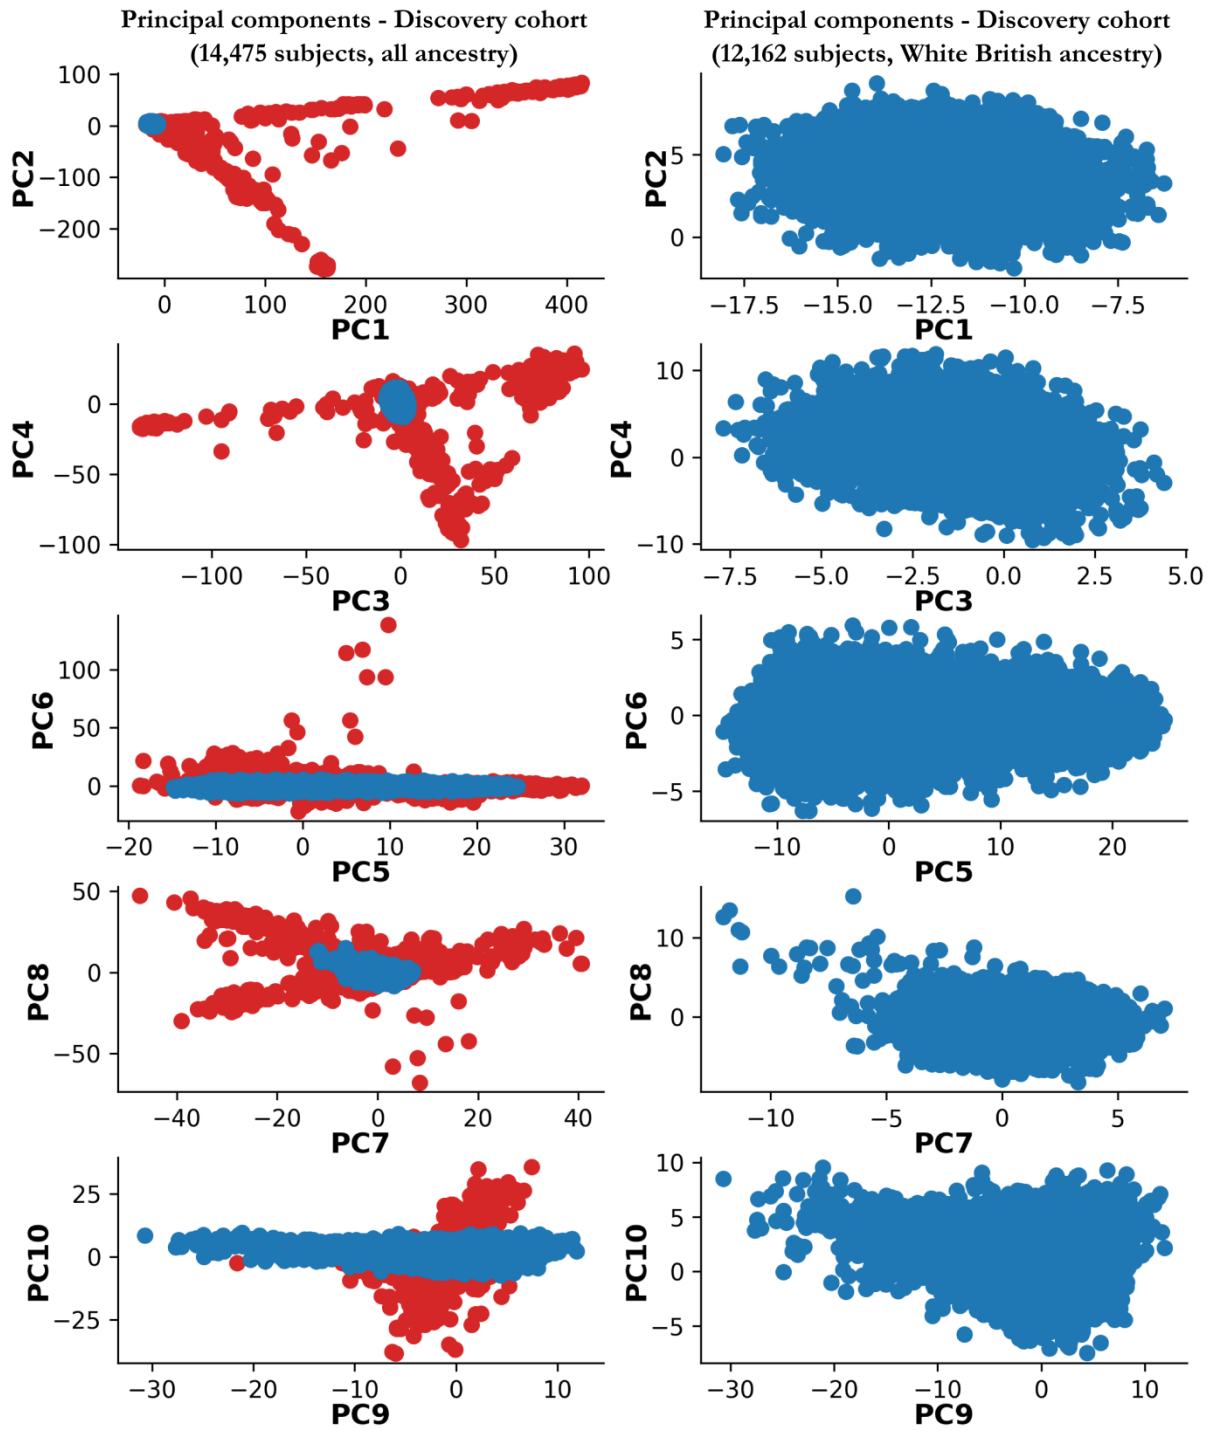

Figure S2. Ten genetic principal components (PCs) provided by UK Biobank to account for population stratification.

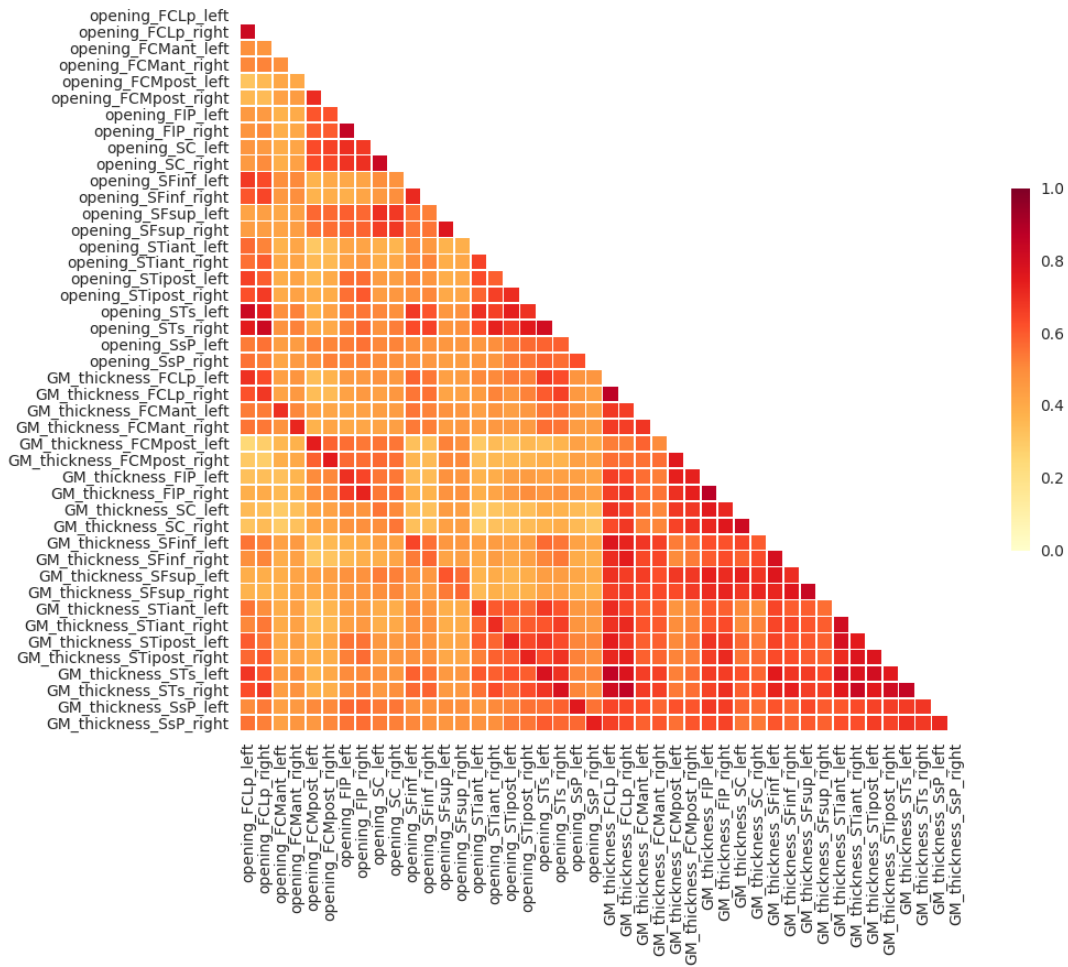

**Figure S3. Correlation matrix (absolute values) of the 40 phenotypes considered.** Note that, without taking the absolute value, opening vs GM thickness correlations are always negative, while opening and GM thickness separately are always positively correlated.

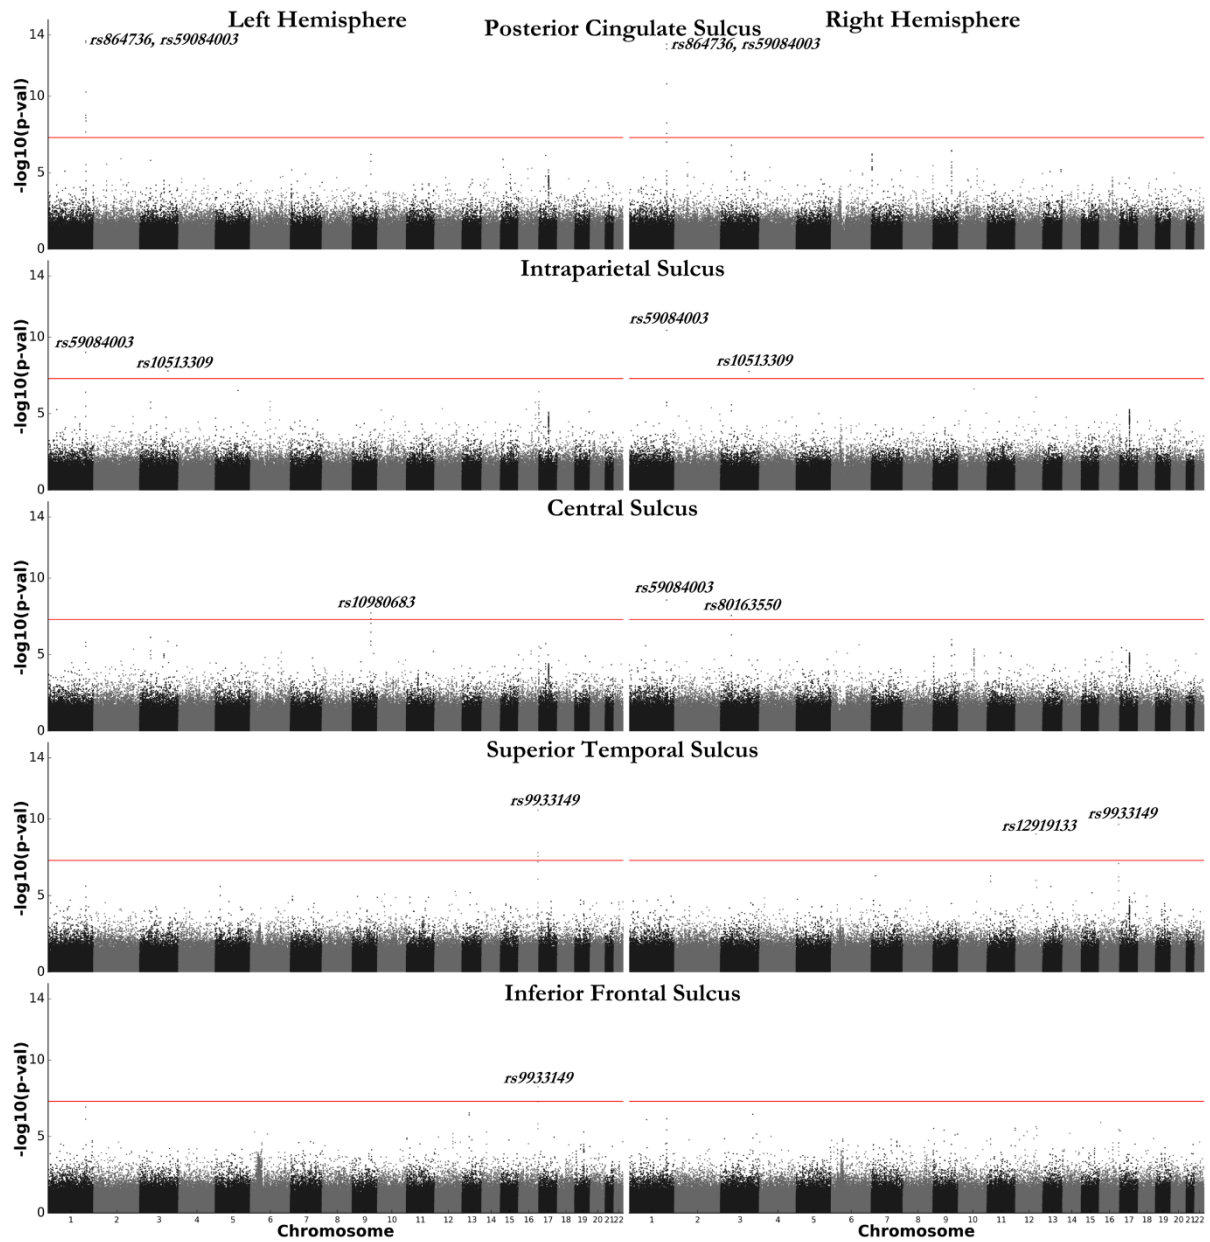

Figure S4. Manhattan plots for five sulci considering their opening as the phenotype for the GWAS.

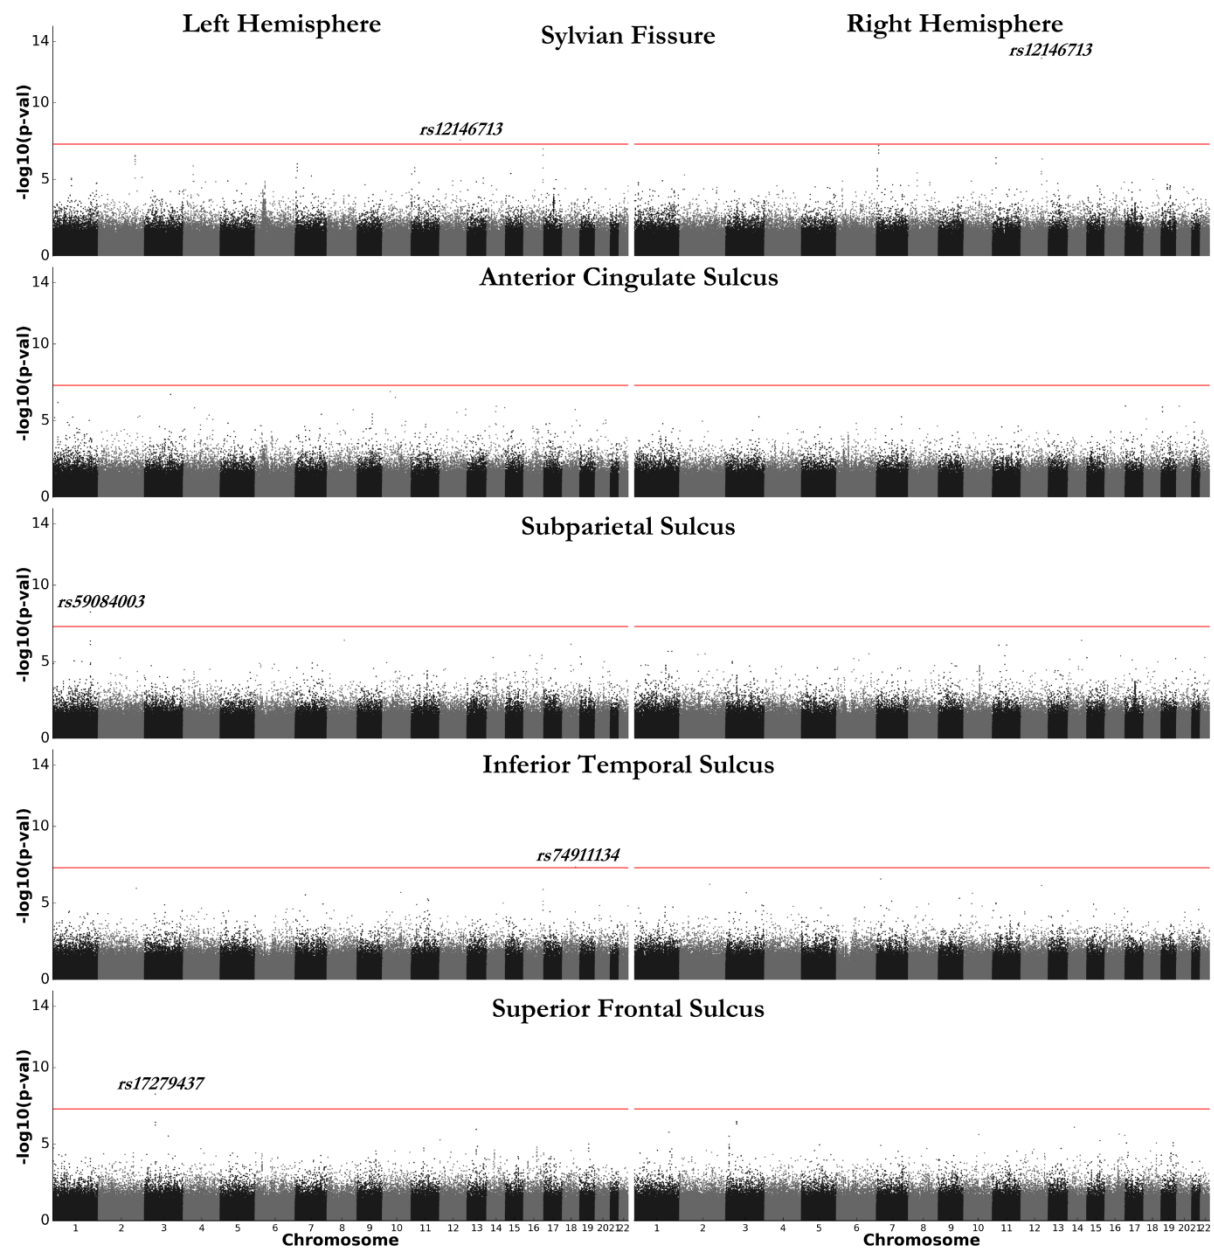

Figure S5. Manhattan plots for five sulci considering their opening as the phenotype for the GWAS.



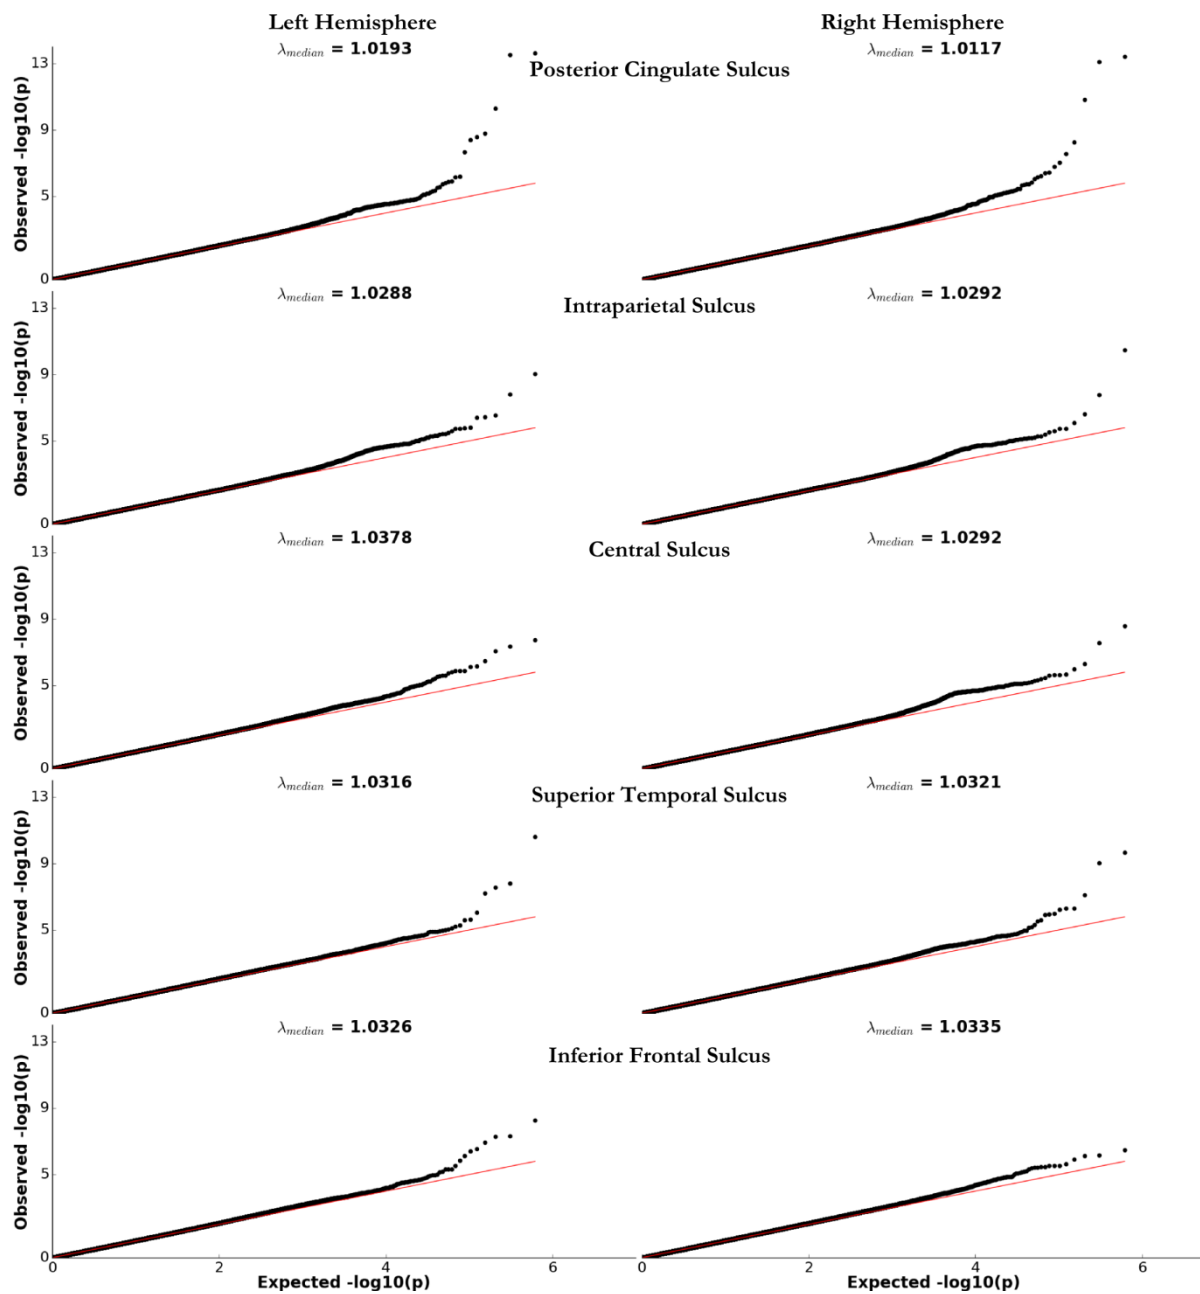

Figure S6. QQ plots for five sulci considering their opening as the phenotype for the GWAS.

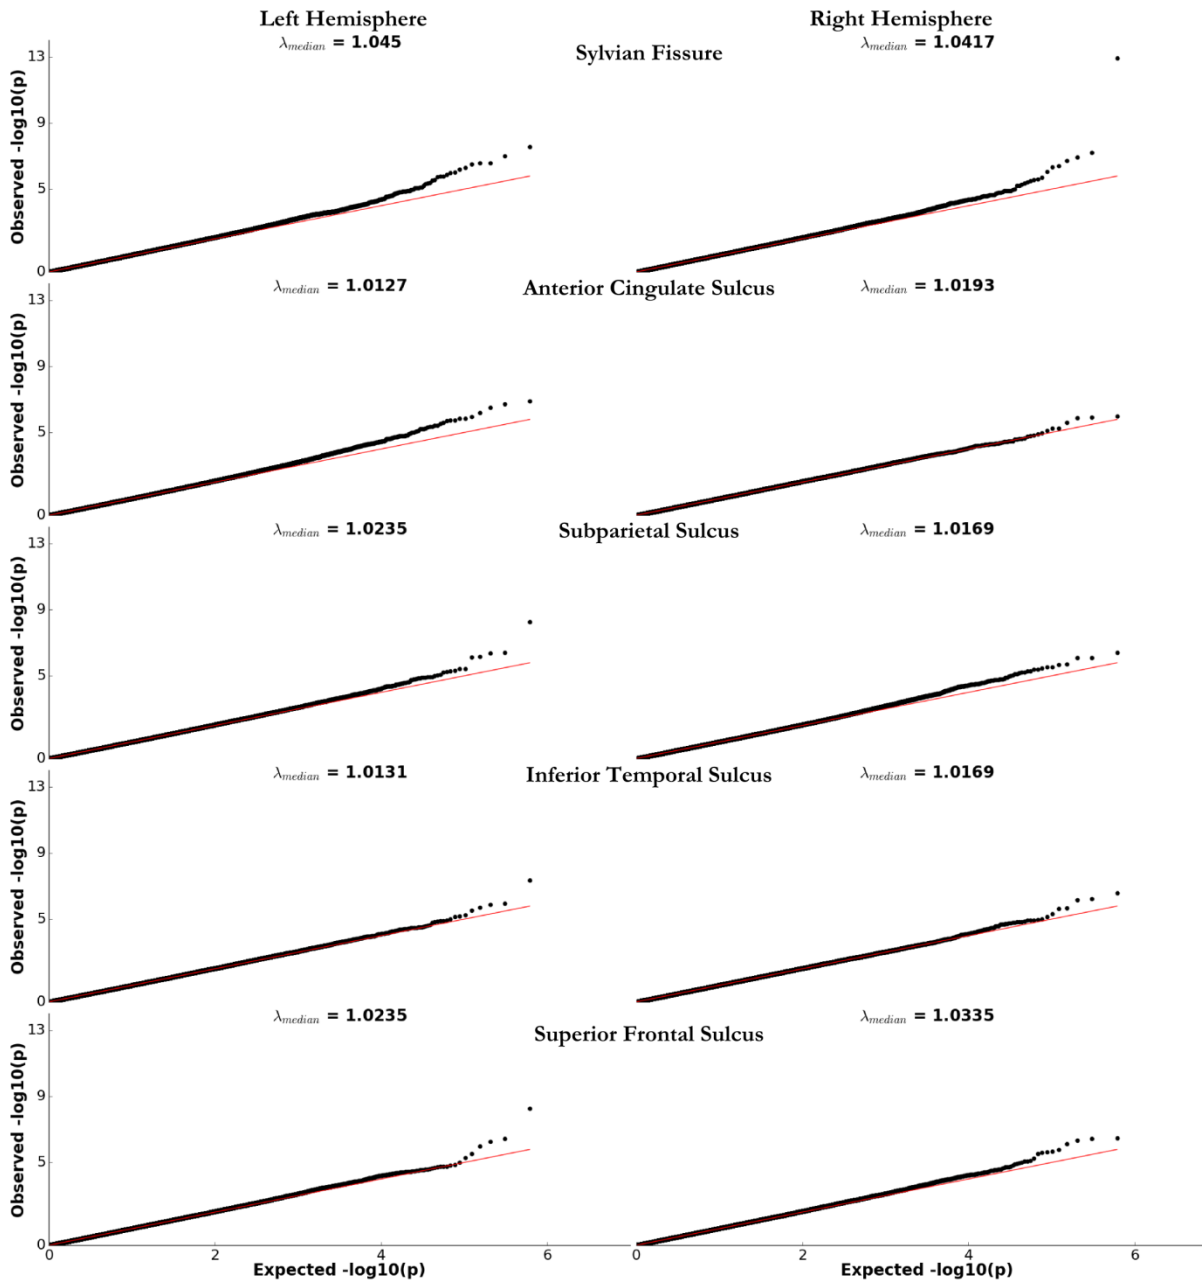

Figure S7. QQ plots for five sulci considering their opening as the phenotype for the GWAS.

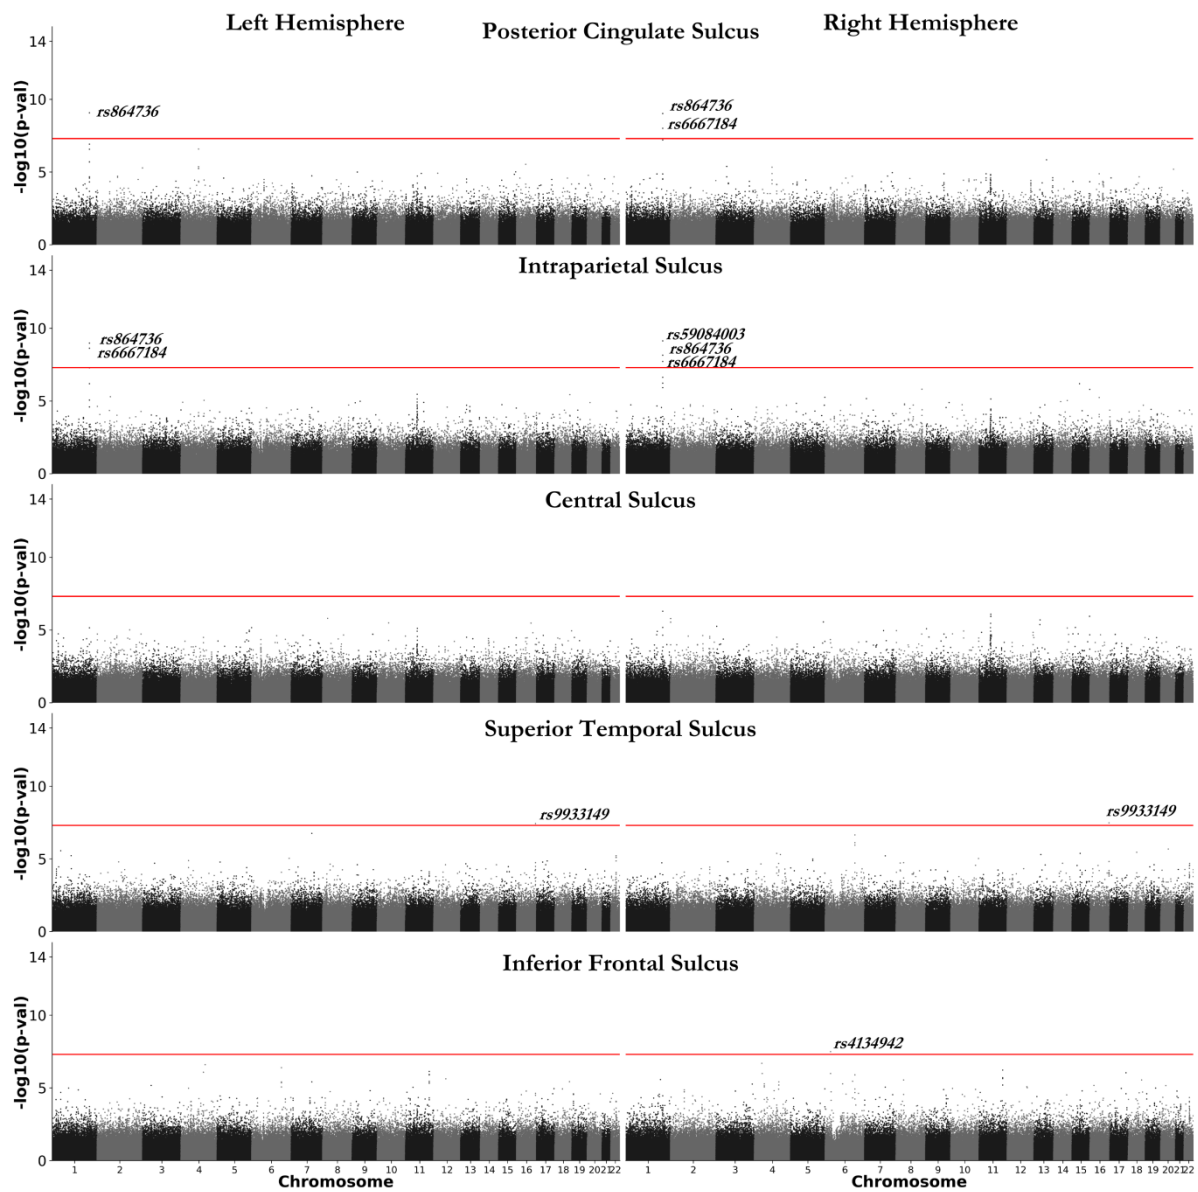

Figure S8. Manhattan plots for five sulci considering their GM thickness as the phenotype for the GWAS.

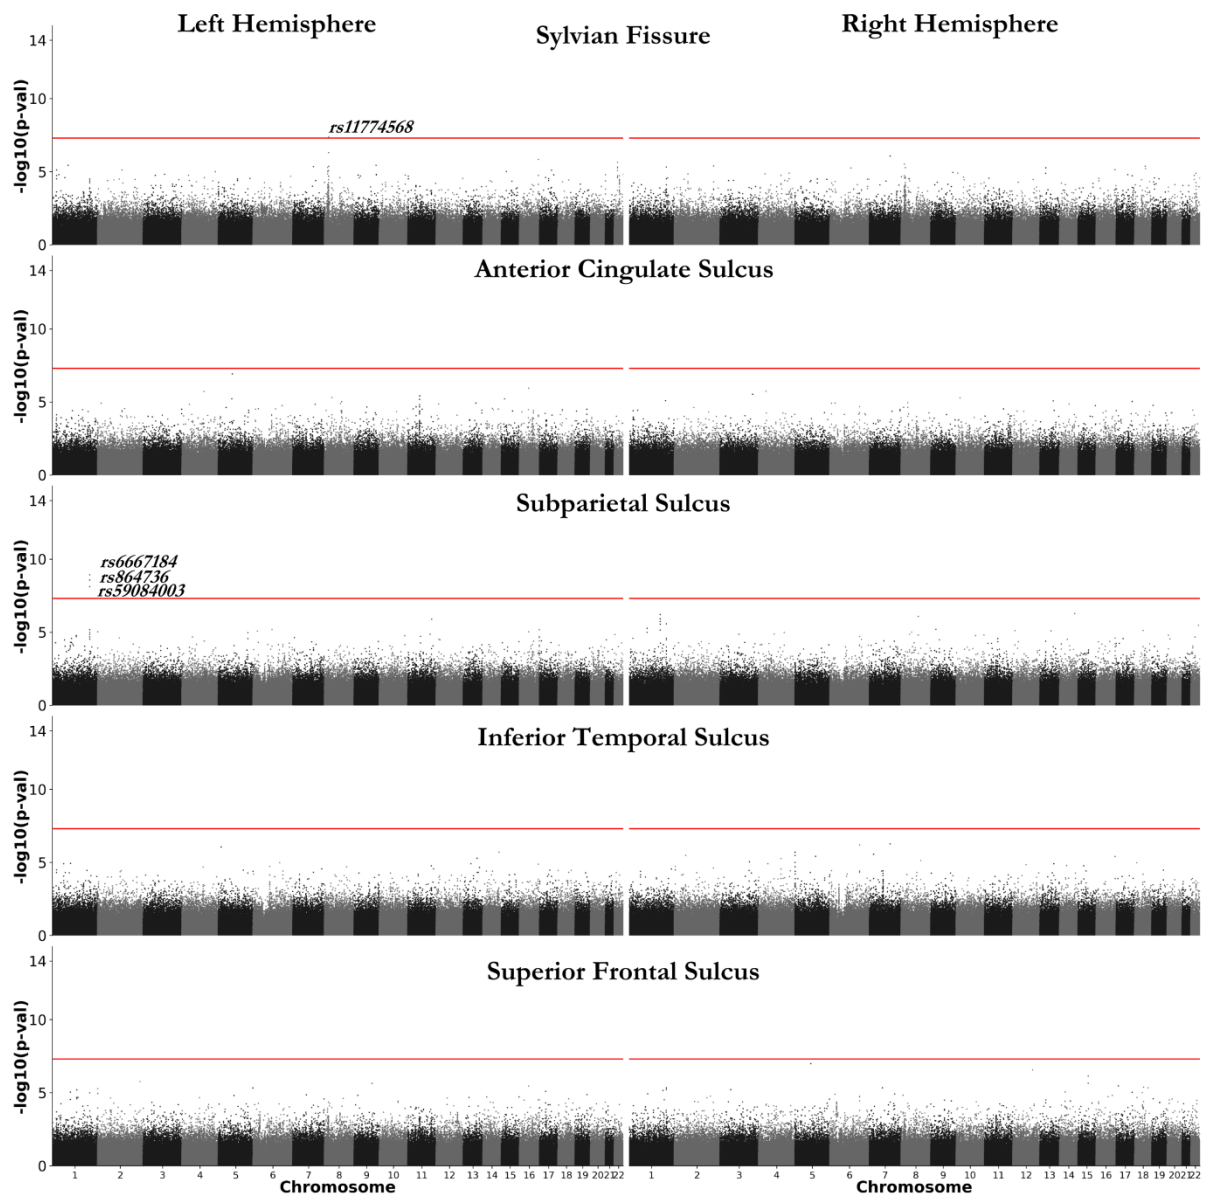

Figure S9. Manhattan plots for five sulci considering their GM thickness as the phenotype for the GWAS.

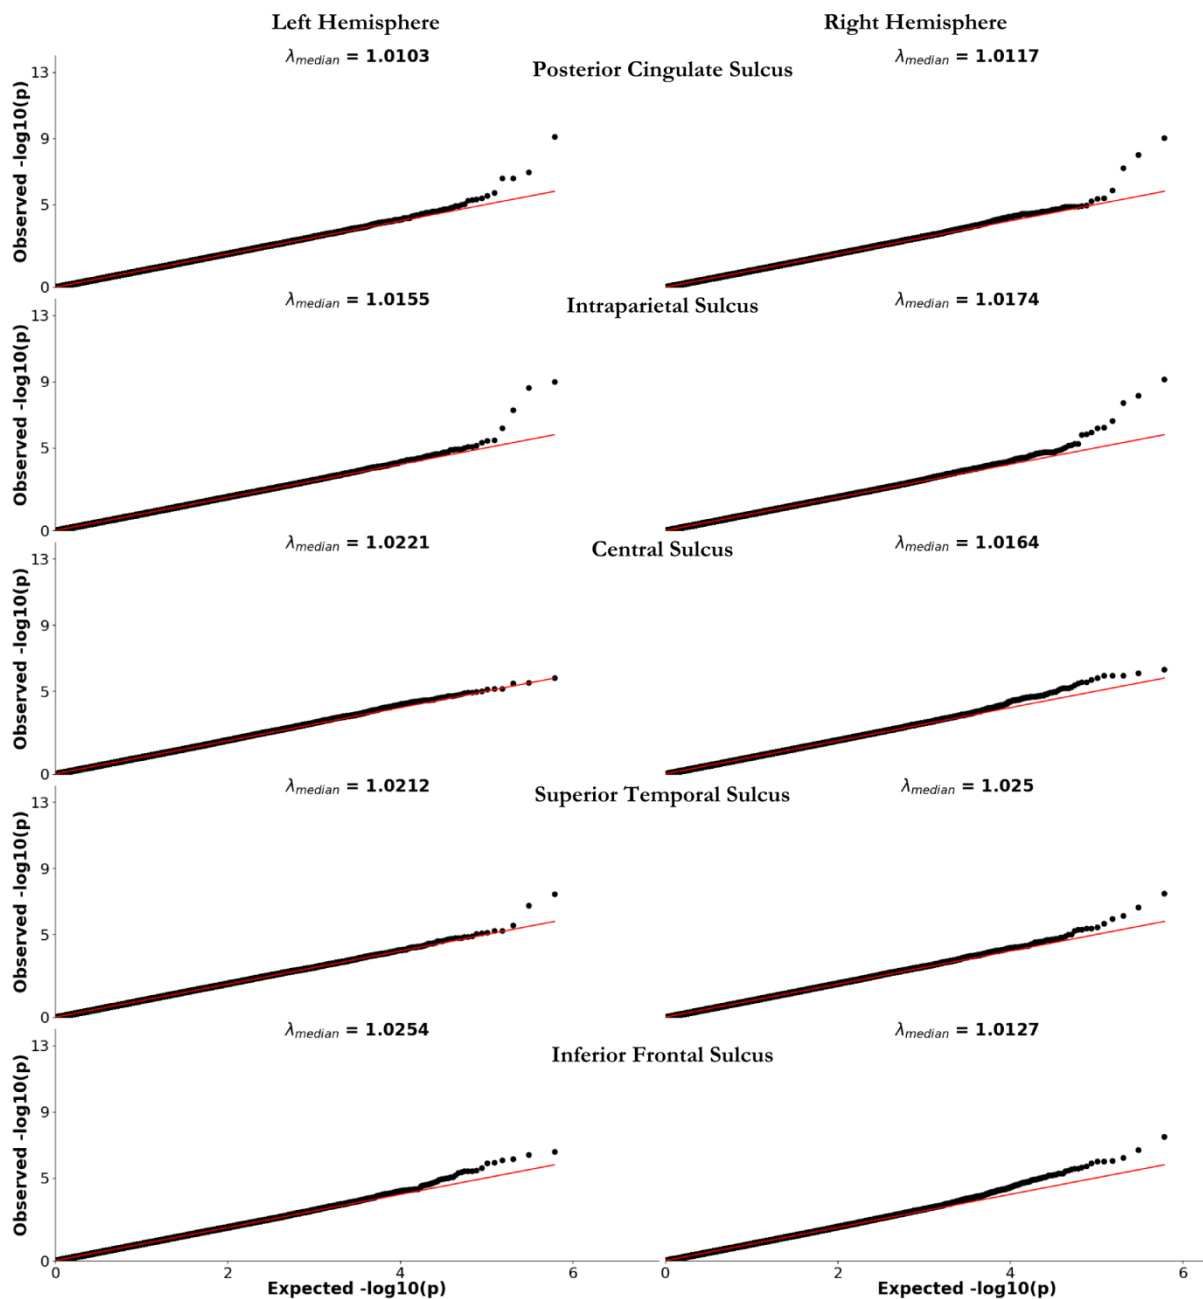

Figure S10. QQ plots for five sulci considering their GM thickness as the phenotype for the GWAS.

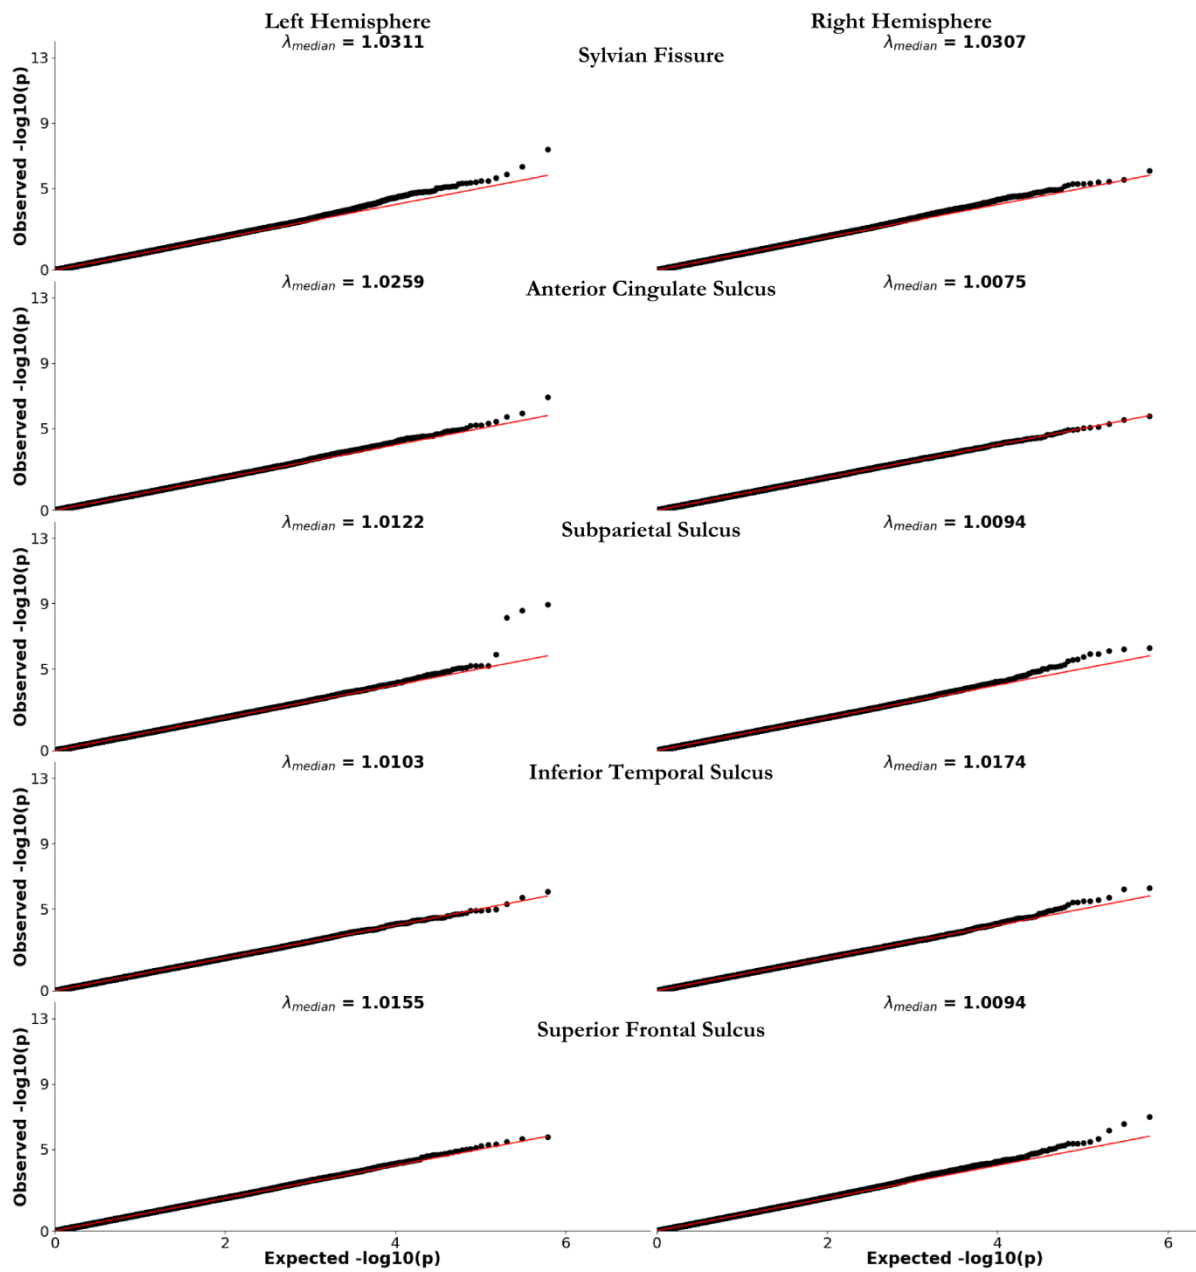

Figure S11. QQ plots for five sulci considering their GM thickness as the phenotype for the GWAS.

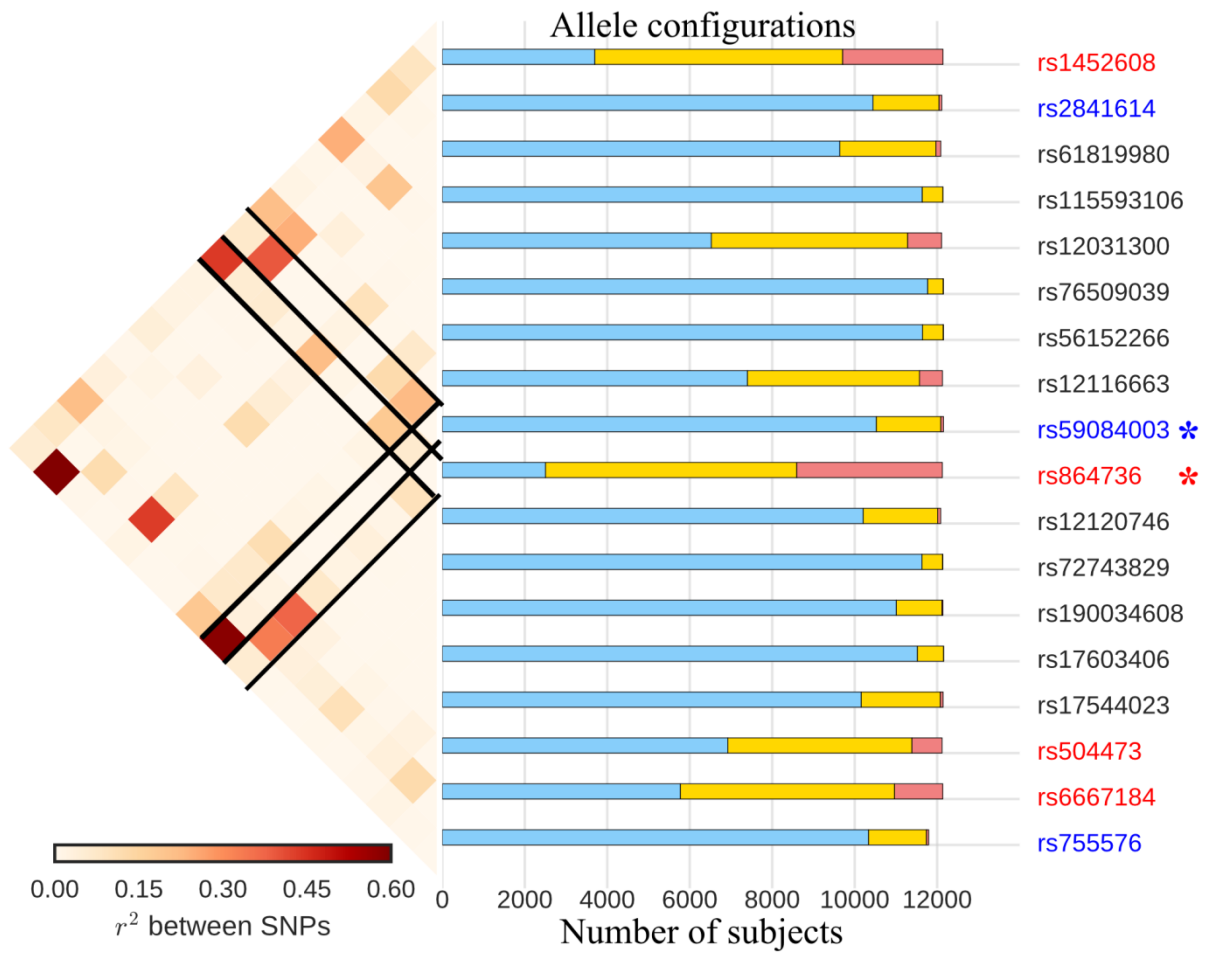

**Figure S12. Linkage disequilibrium ( $r^2$  computed with PLINK) for SNPs in the significant locus upward of *KCNK2*.** The number of subjects for the different allelic configurations is displayed (number of subjects homozygote major allele in blue, heterozygote in yellow, homozygote minor allele in red). The significant variants in GWAS (Tab. 1) in LD with rs864736 and rs59084003 are in red and blue, respectively.

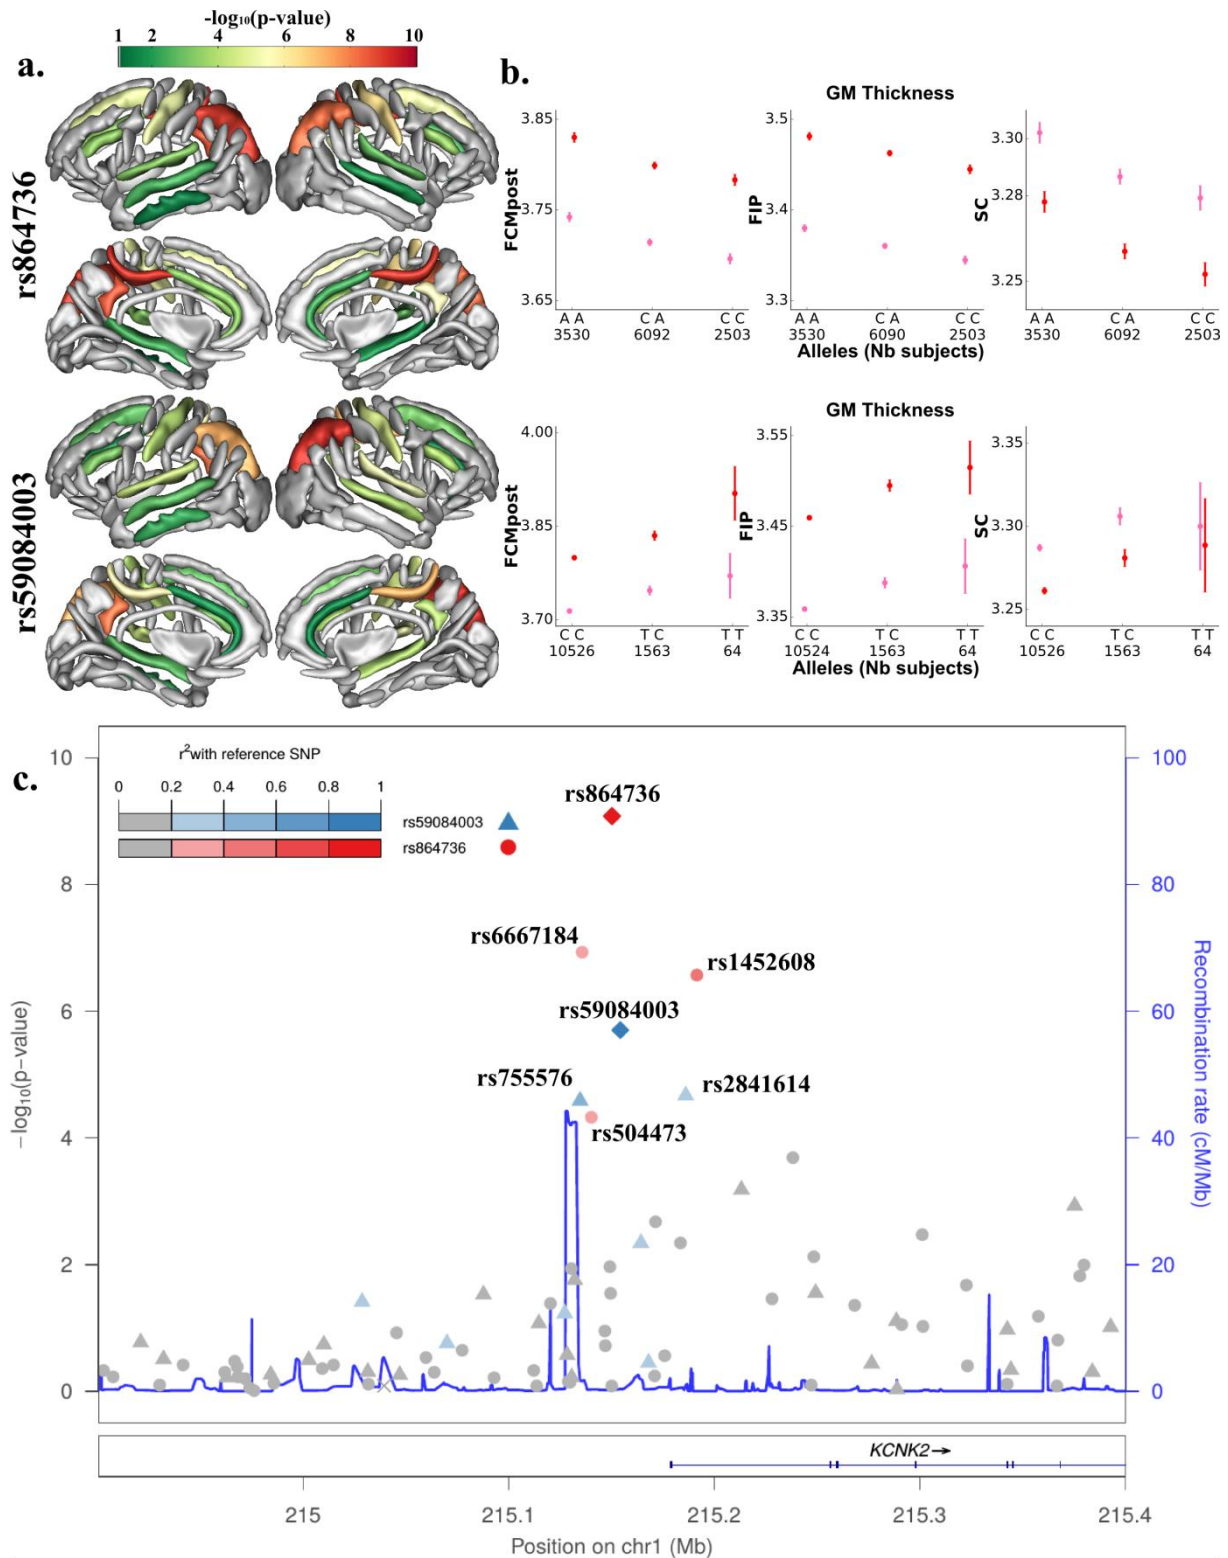

**Figure S13. Most significant GWAS hits on *KCNK2* regulating the GM thickness.** First and second lines correspond to rs864736 and rs59084003, respectively. Lines represents respectively: **a.** the log<sub>10</sub>(p-value) of each SNPs mapped onto the nominally significant sulci among the ten considered; **b.** the mean GM thickness and standard error for each configuration of variants in the most significant sulci; **c.** Locuszoom display (Pruim et al. 2011) of the phenotype-variants association for the region upward to *KCNK2* with the left posterior cingulate sulcus opening as a phenotype..



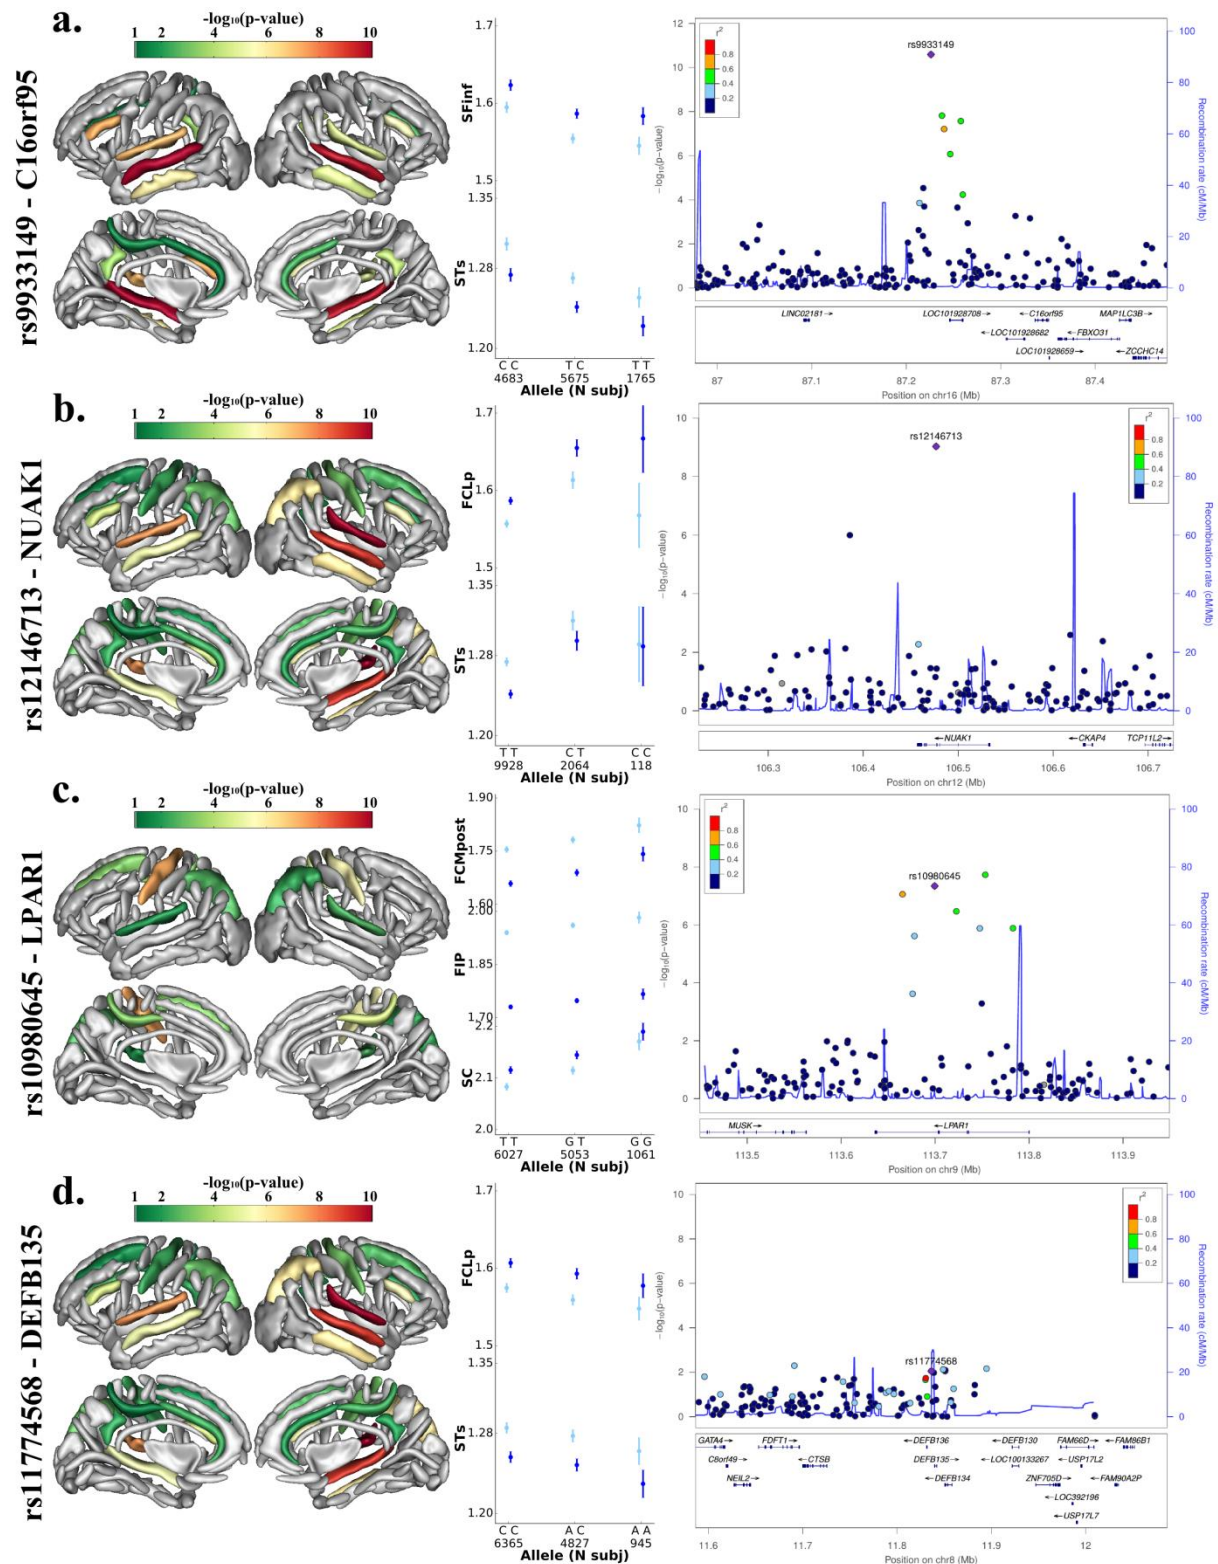

**Figure S14. Four significant GWAS hits on the sulcal opening.** Lines correspond to the SNPs presented in the following order rs9933149 (a.), rs12146713 (b.), rs10980645 (c.), rs11774568 (d.). Columns represent respectively the  $\log_{10}(\text{p-value})$  of each SNP mapped onto the nominally significant sulci among the ten considered; the mean sulcal opening and standard error for each configuration of variants in the most significant sulci; LocusZoom display (Pruim et al. 2011) for each variant with the associated most significant phenotype.

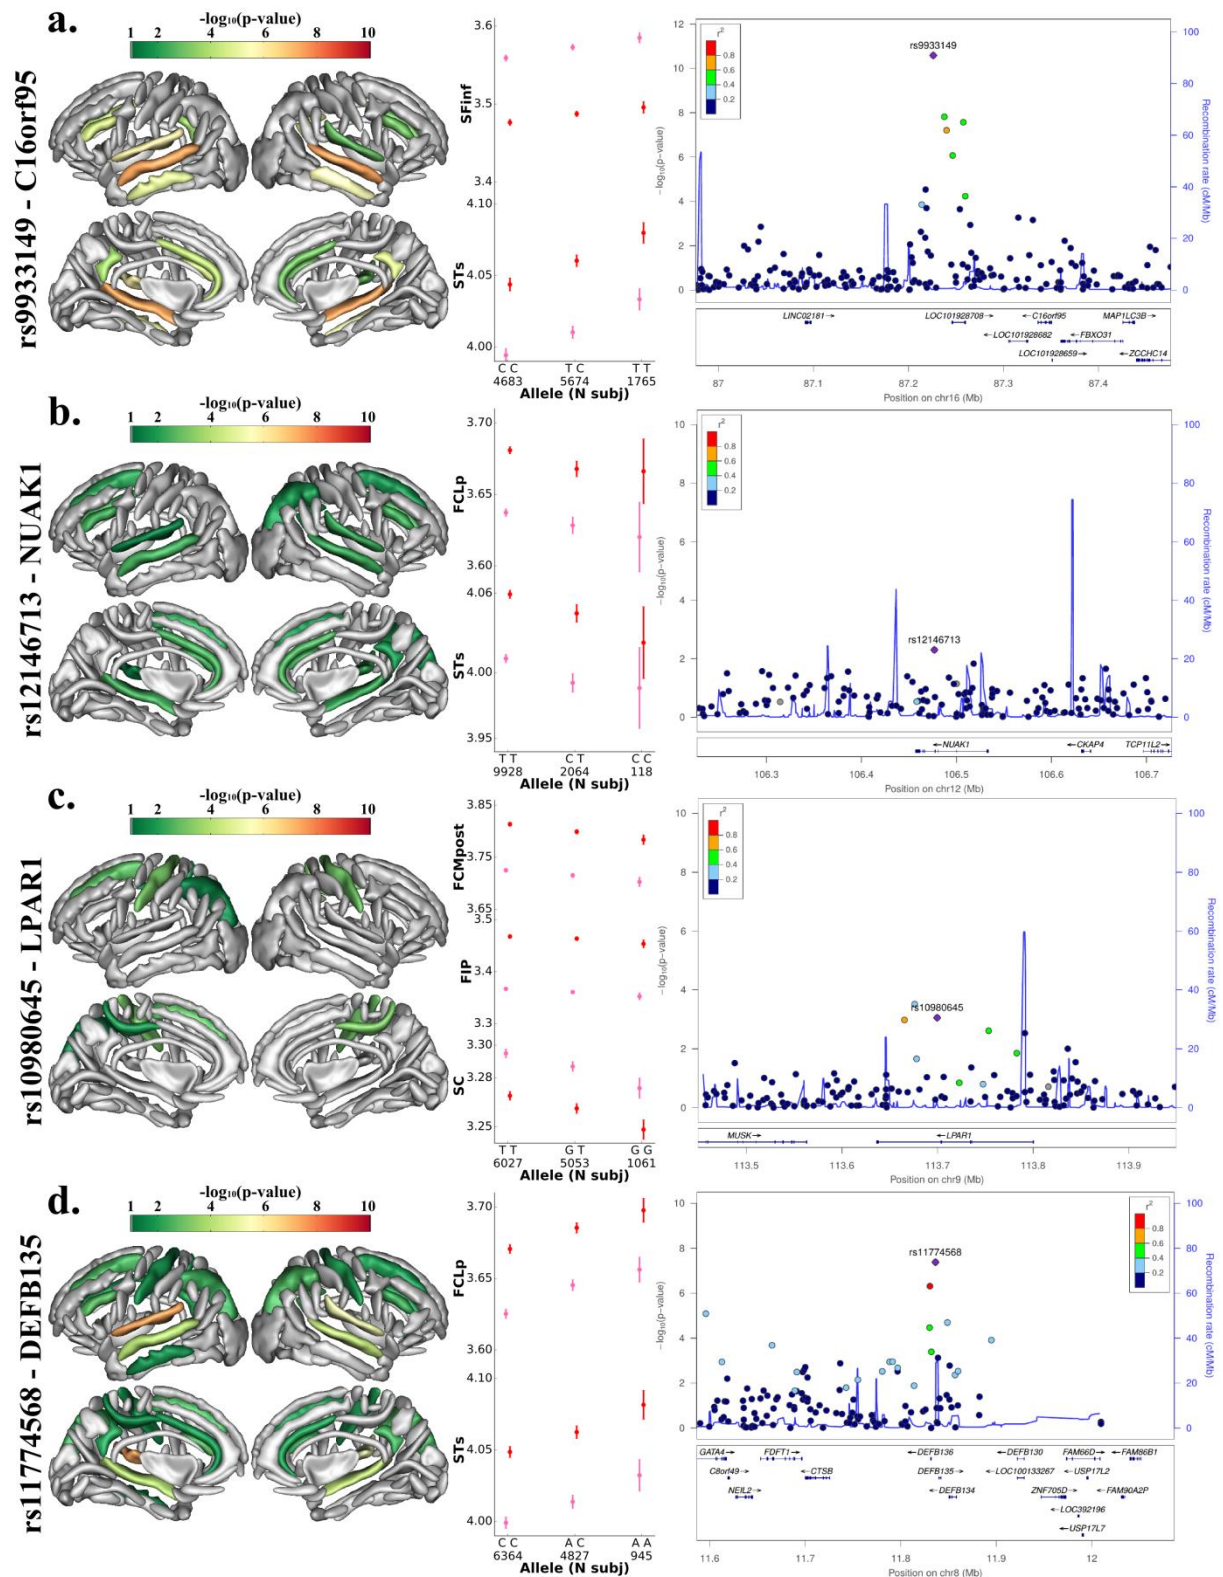

**Figure S15. Four significant GWAS hits on the grey matter thickness of the sulci.** Lines correspond to the SNPs presented in the following order rs9933149 (a.), rs12146713 (b.) rs10980645 (c.) rs11774568 (d.). Columns represents respectively: the  $\log_{10}(\text{p-value})$  of each SNPs mapped onto the nominally significant sulci among the ten considered; the mean sulci grey matter thickness and standard error for each configuration of variants in the most significant sulci; Locuszoom display (Pruim et al. 2011) for each variant with the associated most significant phenotype.

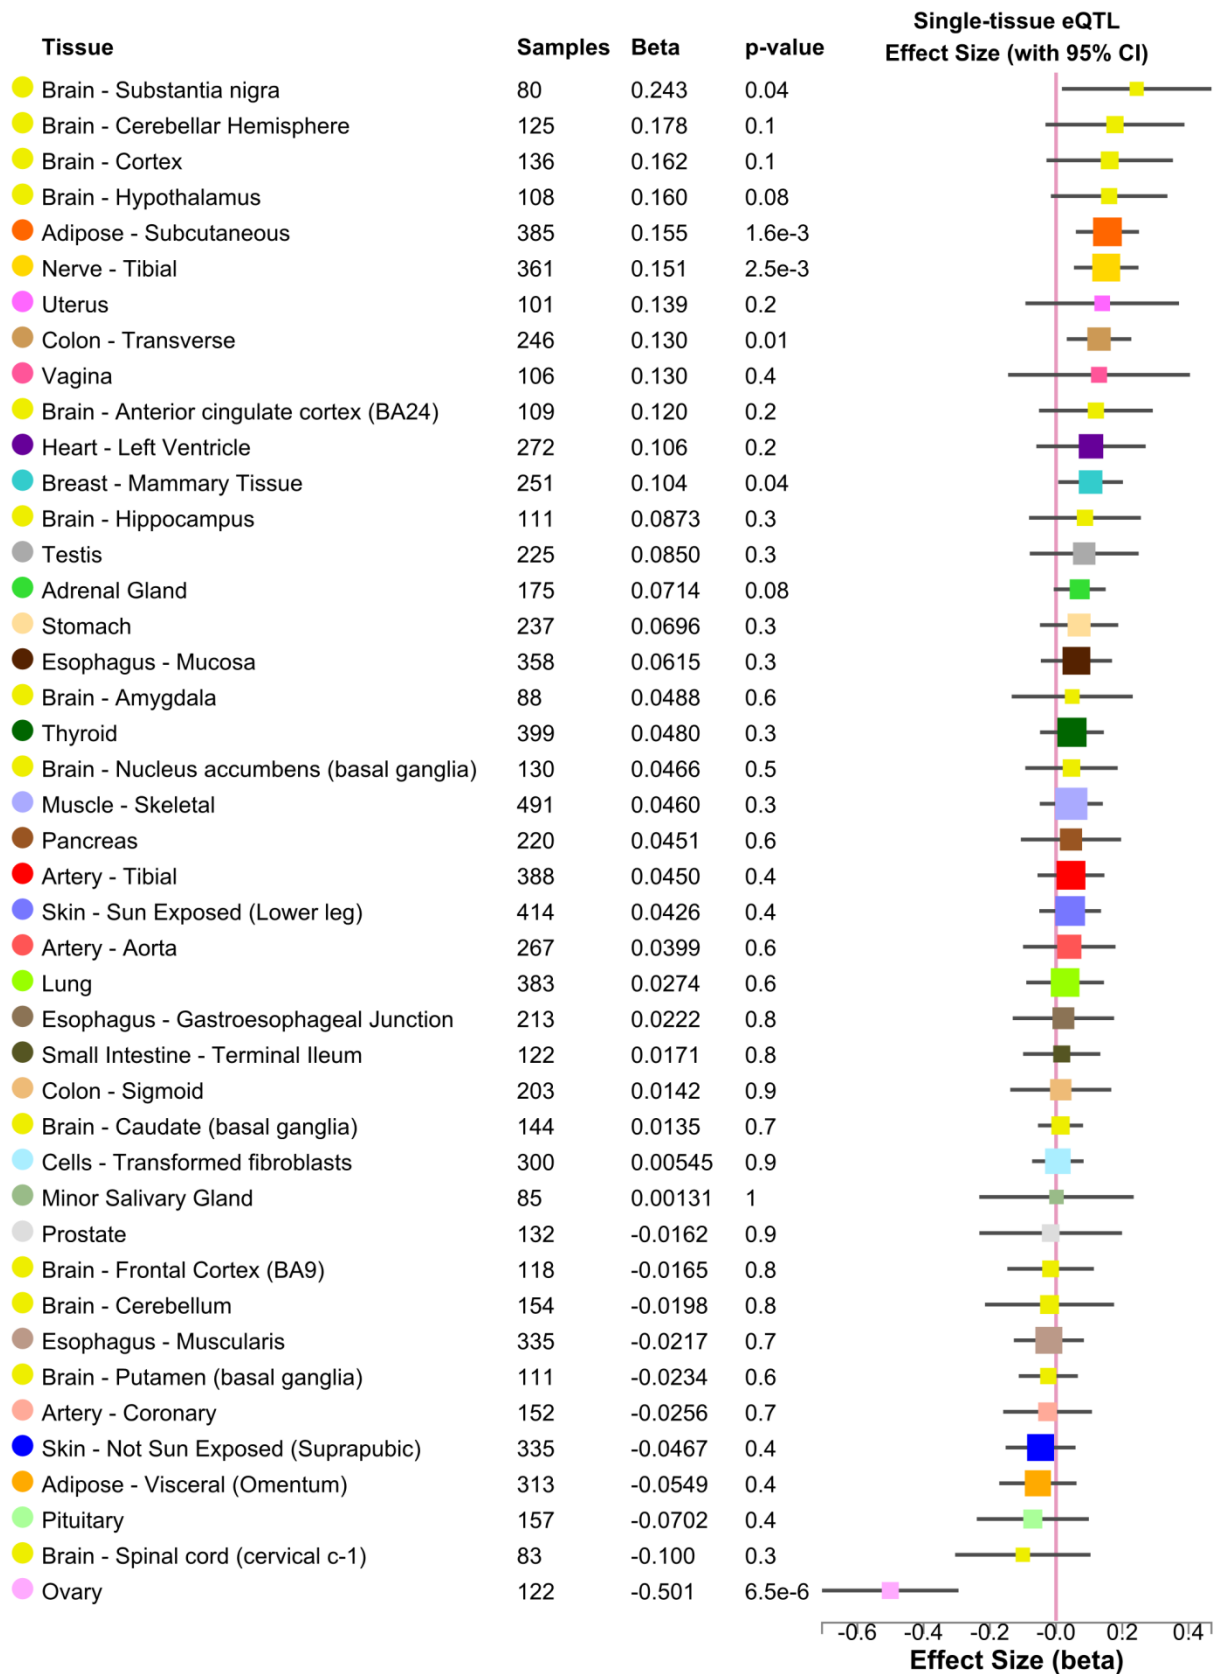

**Figure S16. Multi-tissue eQTLs comparison for gene *KCNK2* and variant rs864736 (ENSG00000082482.9 *KCNK2* and 1\_215150260\_C\_A\_b37 eQTL). Meta-Analysis Random Effect Model2 (Han and Eskin 2011) p-val =  $9.7 \cdot 10^{-6}$ . (Data Source: GTEx Analysis Release V7, dbGaP Accession phs000424.v7.p2)**
